# Supplementary material
Source: PubMed Central journal article supplement (PMC6423509)
Supplement: NIHMS1002836-supplement-Supplemental_file.pdf [file NIHMS1002836-supplement-Supplemental_file.pdf]

Supplementary table: Recent sexual activity, withdrawal use, and condom use among men aged 15-19 by NSFG survey year, 2007-2014

|                                             |      |                 |      |                 | 2007 v<br>2014 | Testing for linear trend from 2007-<br>2014 |        |                 |              |                        |                               |                                |
|---------------------------------------------|------|-----------------|------|-----------------|----------------|---------------------------------------------|--------|-----------------|--------------|------------------------|-------------------------------|--------------------------------|
|                                             | 2007 |                 | 2009 |                 |                | 2012                                        |        | 2014            |              | Only<br>linear<br>term | Linear and quadratic<br>terms |                                |
|                                             | %    | 95% CI          | %    | 95% CI          |                | %                                           | 95% CI | %               | 95% CI       |                        | p-value<br>(linear<br>term)   | p-value<br>(quadratic<br>term) |
| <b>Sexually active in<br/>last 3 months</b> | 27   | (23.4,<br>31.0) | 29   | (23.4,<br>33.3) | 32             | (27.3,<br>36.4)                             | 26     | (23.1,<br>29.4) | 0.730        | 0.932                  | 0.964                         | 0.080                          |
| <b>Method type</b>                          |      |                 |      |                 |                |                                             |        |                 |              |                        |                               |                                |
| Condom                                      | 74   | (66.4,<br>80.1) | 74   | (66.3,<br>80.0) | 77             | (71.5,<br>82.1)                             | 72     | (65.0,<br>78.7) | 0.768        | 0.991                  | 0.984                         | 0.478                          |
| Withdrawal                                  | 14   | (10.0,<br>20.4) | 22   | (16.6,<br>29.3) | 19             | (14.2,<br>25.5)                             | 32     | (24.5,<br>40.9) | <b>0.000</b> | <b>0.001</b>           | <b>0.001</b>                  | 0.591                          |
